# Supplementary material for: Confirming a major QTL and finding additional loci responsible for field resistance to brown spot (Bipolaris oryzae) in rice
Source: PubMed Central journal article supplement — Breed Sci. 2015 Mar 1;65(2):170–5. doi: 10.1270/jsbbs.65.170 (PMC4430509; doi:10.1270/jsbbs.65.170), 2015-03-01
Supplement: 65_170_1.pdf [file 65_170_1.pdf]

**Supplemental Table 1.** Disease scores used to assess the virulence of brown spot of rice in the field

| Score | Infected leaf area of total (%) | Lesion type                                                                                          |
|-------|---------------------------------|------------------------------------------------------------------------------------------------------|
| 0     | 0                               | No lesions observed                                                                                  |
| 1     | <1                              | Typical lesions: Minute brown spots (i. e., brown spot disease)                                      |
| 2     | 1–3                             | Brown spots                                                                                          |
| 3     | 3–5                             | Brown spots                                                                                          |
| 4     | 5–10                            | Most of the lesions are brown spot, but some large spots with a grayish center are slightly appeared |
| 5     | 10–15                           | Half of the lesions are large spots                                                                  |
| 6     | 15–20                           | More than 2/3 of total lesions are large spots                                                       |
| 7     | 20–30                           | Most of the lesions are large spots                                                                  |
| 8     | 30–50                           | Most of the lesions are large spots                                                                  |
| 9     | >50                             | Most of the lesions are large spots                                                                  |

Based on the rapid assessment scale for brown spot disease reported by Matsumoto *et al.* (2014).
